# Supplementary material for: Squamous cell carcinomas escape immune surveillance via inducing chronic activation and exhaustion of CD8+ T Cells co-expressing PD-1 and LAG-3 inhibitory receptors
Source: PubMed Central journal article supplement (PMC5340255; doi:10.18632/oncotarget.13228), 2016-11-09
Supplement: oncotarget-07-81341-s001.pdf [file oncotarget-07-81341-s001.pdf]

## Squamous cell carcinomas escape immune surveillance via inducing chronic activation and exhaustion of CD8<sup>+</sup> T cells co-expressing PD-1 and LAG-3 inhibitory receptors

### Supplementary Materials

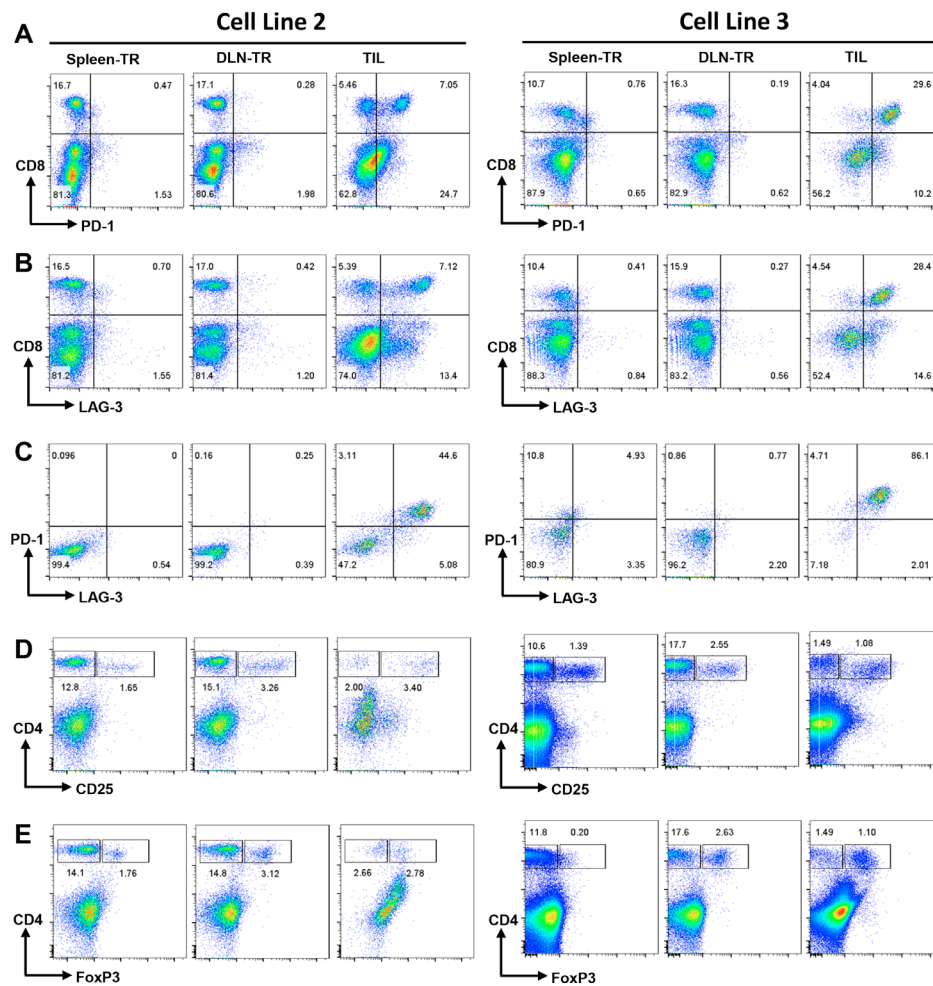

**Supplementary Figure S1: Immune profiling of TILs in additional KRS-SCC cell lines.** KRS-SCC cell line 2 (A223-H496) or cell line 3 (B866) were injected into wt B6 recipient mice individually to validate the immune phenotypes observed in cell line 1 (A223-H500). (A–C) Representative FACS plots are shown for CD8 vs PD-1 (A), CD8 vs LAG-3 (B), PD-1 vs LAG-3 gated on CD8<sup>+</sup> (C). (D–E) Representative FACS plots are shown for CD4 vs CD25 (D) or CD4 vs FoxP3 (E) staining in different groups.

**Supplemental Table S1: Summary of *in vivo* experiment replicates and sample size**

| Experiment                    | # of Experiments | Cell line   | Sample                                       |
|-------------------------------|------------------|-------------|----------------------------------------------|
| <b>TIL Profile</b>            | Exp 1            | Cell line 1 | Tumor ( $n = 8$ )                            |
|                               | Exp 2            | Cell line 1 | Tumor ( $n = 6$ )                            |
|                               | Exp 3            | Cell line 1 | Tumor ( $n = 12$ )                           |
|                               | Exp 4            | Cell line 2 | Tumor ( $n = 8$ )                            |
|                               | Exp 5            | Cell line 3 | Tumor ( $n = 6$ )                            |
|                               | Exp 6            | Cell line 2 | Tumor ( $n = 6$ )                            |
|                               | Exp 7            | Cell line 1 | Tumor ( $n = 10$ )                           |
| <b>Wt vs CD8KO recipients</b> | Exp 1            | Cell line 1 | Control ( $n = 6$ ), CD8KO ( $n = 6$ )       |
|                               | Exp 2            | Cell line 1 | Control ( $n = 6$ ), CD8KO ( $n = 6$ )       |
|                               | Exp 3            | Cell line 1 | Control ( $n = 6$ ), CD8KO ( $n = 6$ )       |
|                               | Exp 4            | Cell line 1 | Control ( $n = 12$ ), CD8KO ( $n = 12$ )     |
| <b>Dual Inhibition</b>        | Exp 1            | Cell line 1 | Control ( $n = 10$ ), Treatment ( $n = 14$ ) |
|                               | Exp 2            | Cell line 1 | Control ( $n = 8$ ), Treatment ( $n = 8$ )   |
|                               | Exp 3            | Cell line 1 | Control ( $n = 4$ ), Treatment ( $n = 6$ )   |
